# Supplementary material for: High-performance LiMnPO4 nanorods synthesized via a facile EG-assisted solvothermal approach
Source: Royal Society of Chemistry journal article supplement (doi:10.1039/c5ta01218j), 2015-01-01
Supplement: c5ta01218j1.pdf [file c5ta01218j1.pdf]

## Supplementary Information for

# High-performance $\text{LiMnPO}_4$ nanorods synthesized via a facile EG-assisted solvothermal approach

Ye Hong, Zilong Tang\*, Shitong Wang, Wei Quan, Zhongtai Zhang

State Key Laboratory of New Ceramics and Fine Processing, School of Materials Science  
and Engineering, Tsinghua University, Beijing 100084, China

\*Corresponding author E-mail address: [tzl@tsinghua.edu.cn](mailto:tzl@tsinghua.edu.cn)

Tel: +86 10 62783685; Fax: +86 10 62771160

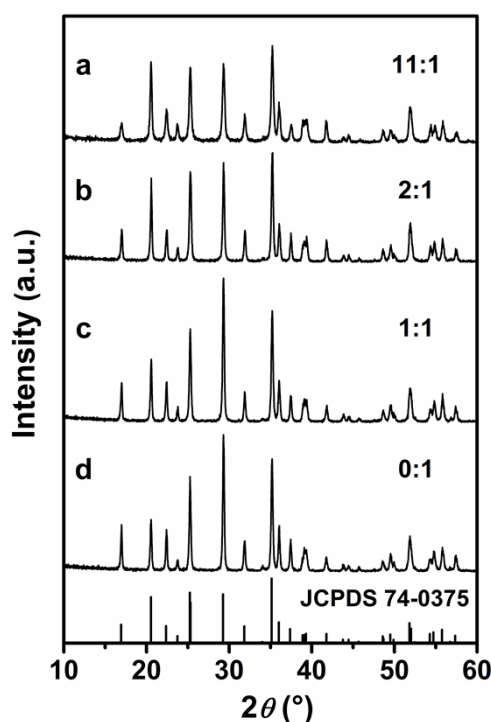

**Fig. S1** XRD patterns of the  $\text{LiMnPO}_4$  samples obtained via the solvothermal approach in different solvent compositions with various volume ratios of EG to water (a) 11:1, (b) 2:1, (c) 1:1, (d) 0:1.

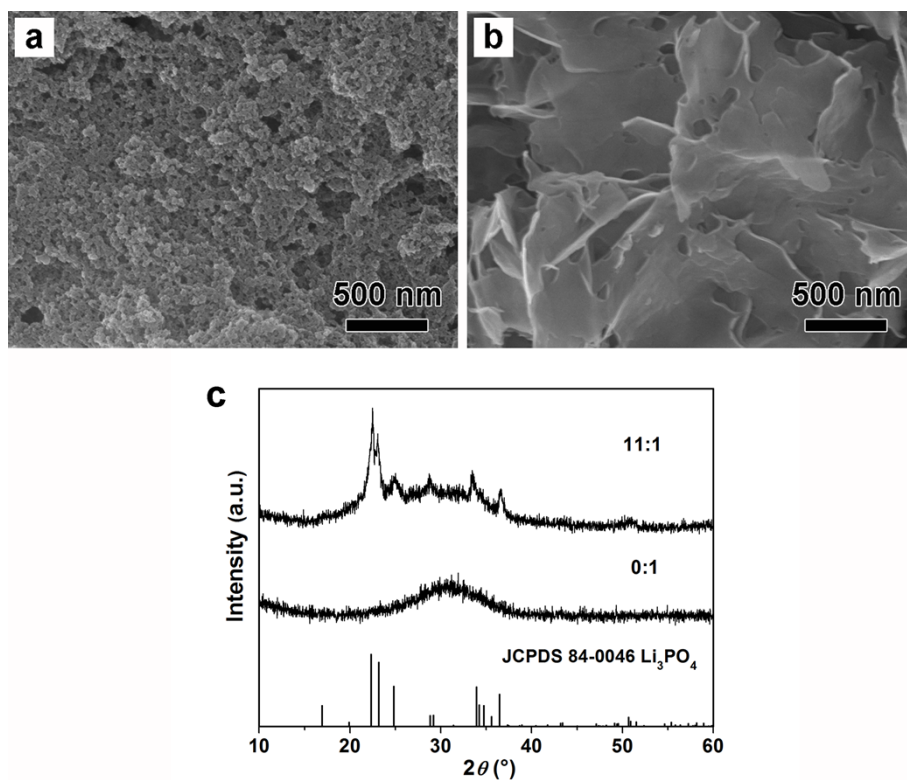

**Fig. S2** (a-b) SEM images and (c) XRD patterns of the immediate products obtained by mixing the reactants in different solvent compositions with various volume ratios of EG to water at room temperature. (a) 11:1, (b) 0:1.

**Table S1** Lattice parameters and unit-cell volume of the LMP-S and LMP/C-S nanorods

| Sample  | $a$ (Å)   | $b$ (Å)  | $c$ (Å)  | $V$ (Å <sup>3</sup> ) |
|---------|-----------|----------|----------|-----------------------|
| LMP-S   | 10.430(7) | 6.094(8) | 4.744(8) | 301.64                |
| LMP/C-S | 10.439(2) | 6.103(7) | 4.743(0) | 302.21                |

**Table S2** BET specific surface areas of the LiMnPO<sub>4</sub> samples obtained via the solvothermal approach in different solvent compositions with various volume ratio of EG to water

| EG: water (vol.)                    | 11:1 | 2:1  | 1:1  | 0:1 |
|-------------------------------------|------|------|------|-----|
| BET/ m <sup>2</sup> g <sup>-1</sup> | 41.0 | 19.3 | 10.1 | 6.3 |
